# Supplementary material
Source: Springer Nature journal article supplement (https://www.springermedizin.de/resource/supplementary/12958_2011_976_MOESM4_ESM.pdf/9566546)

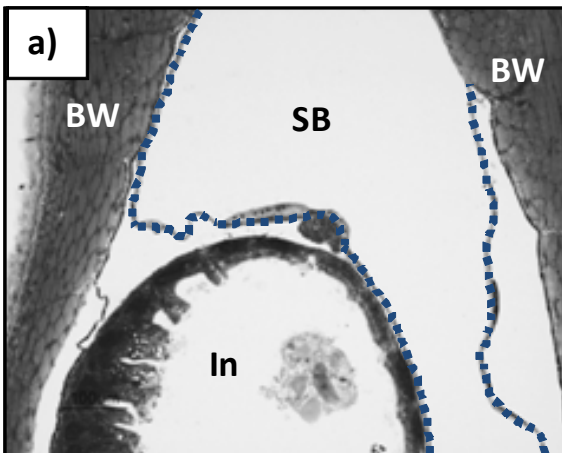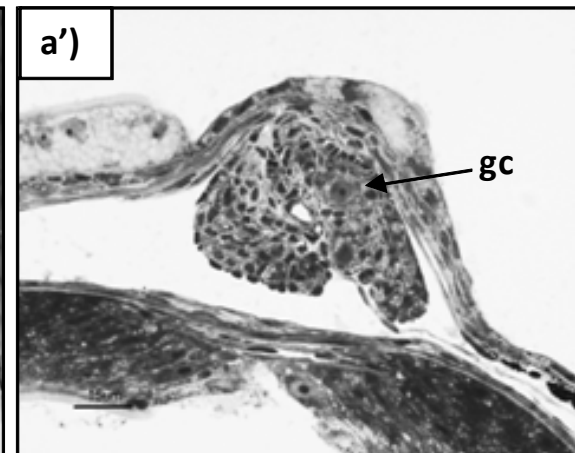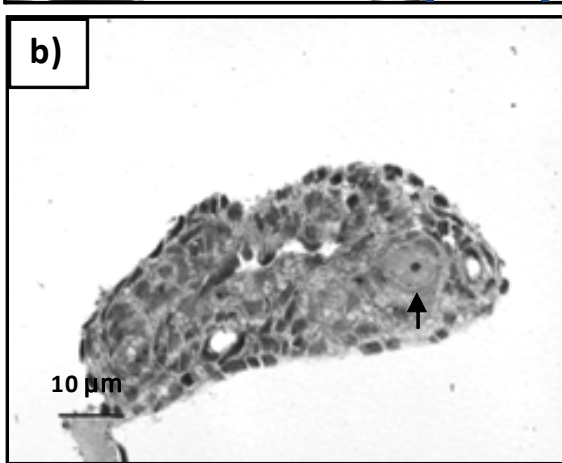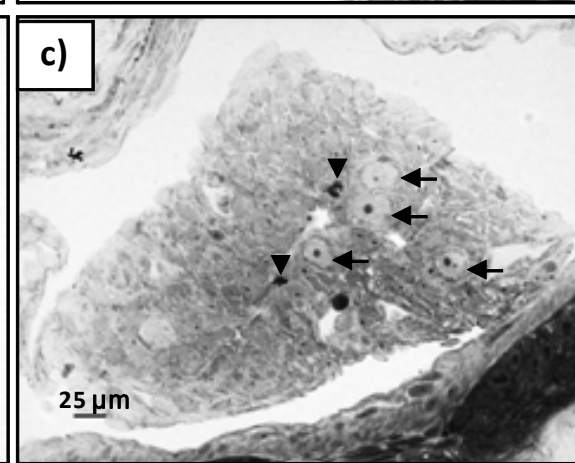

Supplement: MOESM4 [file 9566546]
